# Supplementary material for: The Regulatory Circuit Underlying Downregulation of a Type III Secretion System in Yersinia enterocolitica by Transcription Factor OmpR
Source: MDPI journal article supplement (doi:10.3390/ijms23094758), 2022-04-26
Supplement: s1 [file s1]

**Table S1.** Oligonucleotide primers used in this study.

| Purpose                                                         | Gene name                              | Name of primer | Primer sequence (5' → 3') | Reference  |
|-----------------------------------------------------------------|----------------------------------------|----------------|---------------------------|------------|
| RT-qPCR                                                         | <i>yopD</i>                            | RTyopDYe9-F    | CAAACCGAGTCAGGGAATCA      | This study |
|                                                                 |                                        | RTyopDYe9-R    | CCAGTTCCAACAGCAACAAC      |            |
|                                                                 | <i>yopE</i>                            | RTyopEYe9-F    | GGCACCCAGTGTTATGGAAT      | This study |
|                                                                 |                                        | RTyopEYe9-R    | TGAGGTTTGTAGCCGTTTCAG     |            |
|                                                                 | <i>virF</i>                            | RTvirFYe9-F    | TTTAGGCAACCGCCCAGAAGAA    | This study |
|                                                                 |                                        | RTvirFYe9-R    | GAAATGCCATAAACTGTACCAAACA |            |
|                                                                 | <i>yscM1</i>                           | RTyscM1Ye9-F   | TTCCGATGAGCGCAGATTT       | This study |
|                                                                 |                                        | RTyscM1Ye9-R   | AGACGCCCTTGGTAATAGTTTC    |            |
|                                                                 | <i>yscC</i>                            | RTyscCYe9-F    | TTTCACGTCCGACCTGTTA       | This study |
|                                                                 |                                        | RTyscCYe9-R    | TCCCTTTCAGTTCAGCCACT      |            |
|                                                                 | 16s rRNA<br>(reference gene)           | RT16rRNAYe9-F  | CATCATGGCCCTTACGAGTAG     | [1]        |
|                                                                 |                                        | RT16rRNAYe9-R  | CCGGACTACGACAGACTTTATG    |            |
| EMSA, 255-bp fragment of <i>lcrGVsycD-yopBD</i> promoter region | <i>lcrGVsycD-yopBD</i> promoter region | Lcr-yopFor     | CGGGGCCAAAGAATTAAGCA      | This study |
|                                                                 |                                        | Lcr-yopRev     | GCCGATATCAGCACACATTTCT    |            |
| EMSA, 304-bp fragment of 16S rDNA used as a negative control    | 16S rDNA                               | E16S304Ye-F    | ATTCCGATTAACGCTTGAC       | [2]        |
|                                                                 |                                        | E16S304Ye-R    | GTGGGGTAATGGCTCACCTA      |            |

## References

- Jaworska, K., Ludwiczak, M., Murawska, E., Raczowska, A., Brzostek, K. The Regulator OmpR in *Yersinia enterocolitica* Participates in Iron Homeostasis by Modulating Fur Level and Affecting the Expression of Genes Involved in Iron Uptake. *Int. J. Mol. Sci.* **2021**, 22(3):1475. doi: 10.3390/ijms22031475.
- Nieckarz, M., Raczowska, A., Debski, J., Kistowski, M., Dadlez, M., Heesemann, J., Rossier, O., Brzostek K. Impact of OmpR on the membrane proteome of *Yersinia enterocolitica* in different environments: Repression of major adhesin YadA and heme receptor HemR. *Environ. Microbiol.* **2016**, 18, 997–1021. doi: 10.1111/1462-2920.13165.
